# Supplementary material for: Addressing the Endometriosis Knowledge Gap for Improved Clinical Care—A Cross-Sectional Pre- and Post-Educational-Intervention Study among Pakistani Women
Source: MDPI journal article supplement (doi:10.3390/healthcare11060809), 2023-03-09
Supplement: s1 [file s1]

## **Demographics**

### ***Q1. Age***

- ☐ <18 years
- ☐ 18-29 years
- ☐ 30-39 years
- ☐ >40 years

### ***Q2. Level of education***

- ☐ Primary school
- ☐ Middle school
- ☐ High school
- ☐ Intermediate school
- ☐ Undergraduate
- ☐ Graduate

### ***Q3. Healthcare worker***

- ☐ Yes
- ☐ No

### ***Q4. Access to annual healthcare***

- ☐ Always
- ☐ Often
- ☐ Sometimes
- ☐ Rarely
- ☐ Never

### ***Q5. Age at menarche***

- ☐ <10 years
- ☐ 10-16 years
- ☐ >16 years

### ***Q6. Duration of cycle***

- ☐ <21 days
- ☐ 22-24 days
- ☐ 25-28 days
- ☐ 29-32 days
- ☐ 33-35 days
- ☐ >36 days
- ☐ Irregular

### **Awareness**

***Q7. Heard of endometriosis***

- ☐ Yes
- ☐ No
- ☐ Not sure

### **Pre-intervention questions**

***Q8. Where does endometriosis originate from?***

- ☐ Fallopian tubes
- ☐ Uterus
- ☐ Ovaries
- ☐ Vagina
- ☐ Don't know

***Q9. What are potential causes for pelvic pain (check any that apply)?***

- ☐ Premenstrual syndrome
- ☐ Polycystic ovarian syndrome
- ☐ Ovulation
- ☐ Pelvic inflammatory disease
- ☐ Sexually transmitted infections
- ☐ Uterine fibroids
- ☐ Urinary tract infections
- ☐ Endometriosis
- ☐ Don't know

***Q10. Which of the following are symptoms of endometriosis?***

- ☐ Irregular vaginal bleeding
- ☐ Heavy vaginal bleeding
- ☐ Pain with sexual intercourse
- ☐ Pain during periods
- ☐ Don't know

***Q11. What are the chances a woman with mild or moderate endometriosis will conceive?***

- ☐ Very good
- ☐ Good
- ☐ Fair
- ☐ Poor
- ☐ Very poor
- ☐ Don't know

**Satisfaction of knowledge**

***Q12. Are you satisfied with the knowledge of symptoms related to your periods?***

- ☐ Completely satisfied
- ☐ Somewhat satisfied
- ☐ Neither satisfied nor dissatisfied
- ☐ Somewhat dissatisfied
- ☐ Completely dissatisfied

**Symptoms in the last 3 months**

***Q13. In the last 3 months, have you had pelvic pain with your periods?***

- ☐ Always (3 or 3 periods)
- ☐ Often (2 of 3 periods)
- ☐ Occasionally (1 of 3 periods)
- ☐ Never

***Q14. In the last 3 months, have you had pelvic pain in between one period cycle and the next?***

- ☐ Always (3 of 3 periods)
- ☐ Often (2 of 3 periods)
- ☐ Occasionally (1 of 3 periods)
- ☐ Never

***Q15. In the last 3 months, have you had pelvic pain while urinating or defecating during your period?***

- ☐ Always (3 of 3 periods)
- ☐ Often (2 of 3 periods)
- ☐ Occasionally (1 of 3 periods)
- ☐ Never

**Level of concern**

***Q16. Are you concerned about any symptoms related to your periods?***

- ☐ Extremely concerned
- ☐ Moderately concerned
- ☐ Somewhat concerned
- ☐ Slightly concerned
- ☐ Not at all

***Q17. Have you suspected your symptoms related to your periods are due to endometriosis?***

- ☐ Yes
- ☐ No, but considered
- ☐ No, and not considered

***Q18. If yes, did you discuss these symptoms with your doctor?***

- ☐ Yes
- ☐ No, but considered
- ☐ No, and not considered

### **Interventional brochure**

Please read the image carefully to educate yourselves about endometriosis:

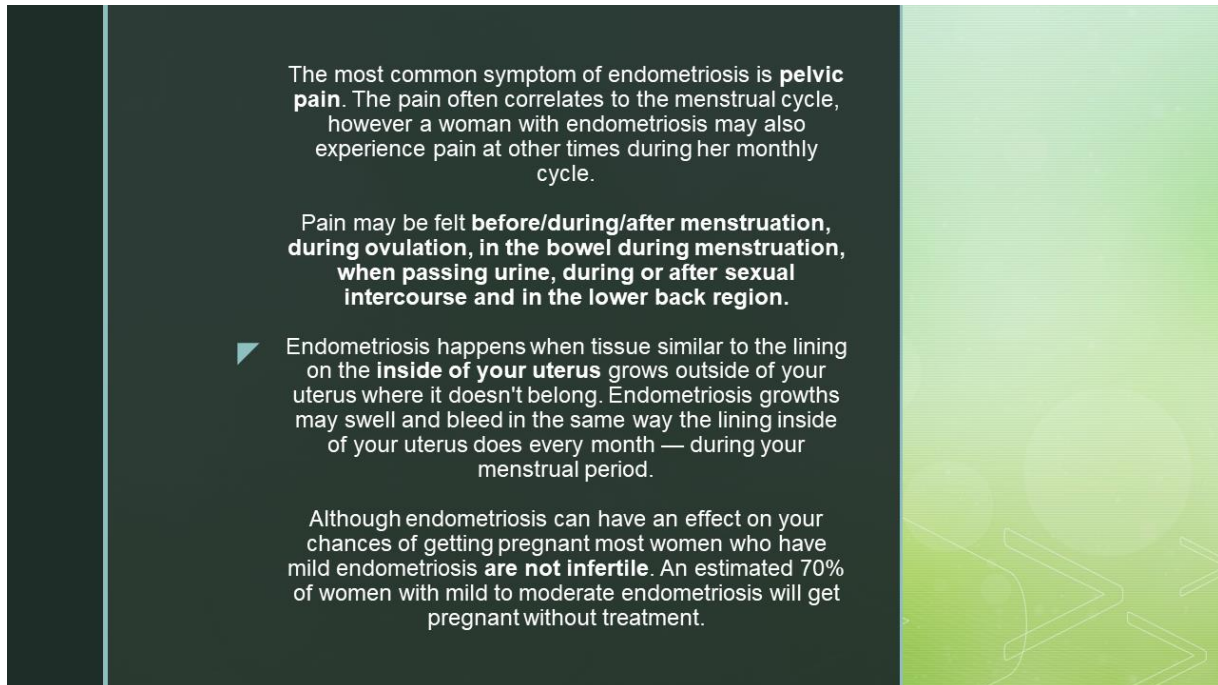

### **Post intervention questions**

***Q19. Where does endometriosis originate from?***

- ☐ Fallopian tubes
- ☐ Uterus
- ☐ Ovaries
- ☐ Vagina
- ☐ Don't know

***Q20. What are potential causes for pelvic pain (check any that apply)?***

- ☐ Premenstrual syndrome
- ☐ Polycystic ovarian syndrome
- ☐ Ovulation
- ☐ Pelvic inflammatory disease
- ☐ Sexually transmitted infections

- Uterine fibroids
- Urinary tract infections
- Endometriosis
- Don't know

***Q21. Which of the following are symptoms of endometriosis?***

- Irregular vaginal bleeding
- Heavy vaginal bleeding
- Pain with sexual intercourse
- Pain during periods
- Don't know

***Q22. What are the chances a woman with mild or moderate endometriosis will conceive?***

- Very good
- Good
- Fair
- Poor
- Very poor
- Don't know
